# Supplementary material
Source: HighWire-hosted journal article supplement (https://qualitysafety.bmj.com/content/29/12/971)
Supplement: inline-supplementary-material-1 [file inline-supplementary-material-1.pdf]

Figure 1: Safer Dx Tool

---

**SaferDx Tool: Screening for Diagnostic Error**

---

The history that was documented at the patient-provider encounter was suggestive of an alternate diagnosis, which was not considered in the assessment

☐ Strongly agree   ☐ Agree   ☐ Slightly agree   ☐ Slightly disagree   ☐ Disagree   ☐ Strongly disagree

The physical exam documented at the patient-provider encounter was suggestive of an alternate diagnosis, which was not considered in the assessment

☐ Strongly agree   ☐ Agree   ☐ Slightly agree   ☐ Slightly disagree   ☐ Disagree   ☐ Strongly disagree

Diagnostic testing data (laboratory, radiology, pathology or other results) associated with the patient-provider encounter were suggestive of an alternate diagnosis, which was not considered in the initial assessment.

☐ Strongly agree   ☐ Agree   ☐ Slightly agree   ☐ Slightly disagree   ☐ Disagree   ☐ Strongly disagree

The diagnostic process at the initial assessment was affected by incomplete or incorrect clinical information given to the care team by the patient or their primary caregiver

☐ Strongly agree   ☐ Agree   ☐ Slightly agree   ☐ Slightly disagree   ☐ Disagree   ☐ Strongly disagree

The clinical information (i.e., history, physical exam or diagnostic data) present at the initial assessment should have prompted additional diagnostic evaluation through tests or consults.

☐ Strongly agree   ☐ Agree   ☐ Slightly agree   ☐ Slightly disagree   ☐ Disagree   ☐ Strongly disagree

Alarm symptoms or "Red Flags" (i.e., features in the clinical presentation that are considered to predict serious disease) were not acted upon at an earlier assessment

☐ Strongly agree   ☐ Agree   ☐ Slightly agree   ☐ Slightly disagree   ☐ Disagree   ☐ Strongly disagree

Diagnostic data (laboratory, radiology, pathology or other results) available or documented at the initial assessment were misinterpreted in relation to the subsequent final diagnosis.

☐ Strongly agree   ☐ Agree   ☐ Slightly agree   ☐ Slightly disagree   ☐ Disagree   ☐ Strongly disagree

The differential diagnosis documented at the initial assessment included the subsequent final diagnosis.

☐ Strongly agree   ☐ Agree   ☐ Slightly agree   ☐ Slightly disagree   ☐ Disagree   ☐ Strongly disagree

The final diagnosis was an evolution of the initial presumed diagnosis

☐ Strongly agree   ☐ Agree   ☐ Slightly agree   ☐ Slightly disagree   ☐ Disagree   ☐ Strongly disagree

The clinical presentation was not typical of the final diagnosis.

☐ Strongly agree   ☐ Agree   ☐ Slightly agree   ☐ Slightly disagree   ☐ Disagree   ☐ Strongly disagree

In conclusion, based on all the above questions, the episode of care under review had a diagnostic error

☐ Yes   ☐ No

If a diagnostic error, what is the clinical impact?

☐ No impact at all  
☐ Minor (patient inconvenience or dissatisfaction)  
☐ Moderate (short-term morbidity, increased length of stay, or invasive procedure)  
☐ Major (death, permanent disability, near life-threatening event)

Figure 2: Diagnostic Error Evaluation and Research (DEER) Taxonomy survey

| <b>DEER Taxonomy for Categorizing Diagnostic Error</b> |                                                                                                                                                                                                                                                                                                                                                                                                                                                                                                                                                                                                                                                                                                                                                        |
|--------------------------------------------------------|--------------------------------------------------------------------------------------------------------------------------------------------------------------------------------------------------------------------------------------------------------------------------------------------------------------------------------------------------------------------------------------------------------------------------------------------------------------------------------------------------------------------------------------------------------------------------------------------------------------------------------------------------------------------------------------------------------------------------------------------------------|
| 1. Access/Presentation                                 | <input type="checkbox"/> Failure/delay in presentation<br><input type="checkbox"/> Failure/denied care access                                                                                                                                                                                                                                                                                                                                                                                                                                                                                                                                                                                                                                          |
| 2. History                                             | <input type="checkbox"/> Failure/delay in eliciting a critical piece of history data<br><input type="checkbox"/> Inaccurate/misinterpreted critical piece of history data<br><input type="checkbox"/> Suboptimal weighing of a critical piece of history data<br><input type="checkbox"/> Failure/delay to follow-up on a critical piece of history data                                                                                                                                                                                                                                                                                                                                                                                               |
| 3. Physical Examination                                | <input type="checkbox"/> Failure/delay in eliciting a critical physical exam finding<br><input type="checkbox"/> Inaccurate/misinterpreted critical physical exam finding<br><input type="checkbox"/> Suboptimal weighing of a critical physical exam finding<br><input type="checkbox"/> Failure/delay in following up on a critical physical exam finding                                                                                                                                                                                                                                                                                                                                                                                            |
| 4. Tests (Laboratory/Radiology)                        | <input type="checkbox"/> Failure/delay in ordering needed test(s)<br><input type="checkbox"/> Failure/delay in performing ordered test(s)<br><input type="checkbox"/> Suboptimal test sequencing<br><input type="checkbox"/> Ordering of wrong test(s)<br><input type="checkbox"/> Test ordered wrong way<br><input type="checkbox"/> Sample mix-up/mislabel<br><input type="checkbox"/> Technical errors/poor processing of specimen/test<br><input type="checkbox"/> Erroneous laboratory/radiology reading of test<br><input type="checkbox"/> Failed/delayed transmission of result to clinician<br><input type="checkbox"/> Failed/delayed follow-up action on test result<br><input type="checkbox"/> Erroneous clinician interpretation of test |
| 5. Assessment                                          | <input type="checkbox"/> Failure/delay in considering correct diagnosis<br><input type="checkbox"/> Suboptimal weighing/prioritizing<br><input type="checkbox"/> Too much weight to lower probability/priority diagnosis<br><input type="checkbox"/> Failure/delay to recognize/weigh urgency<br><input type="checkbox"/> Failure/delay to recognize/weigh complications                                                                                                                                                                                                                                                                                                                                                                               |
| 6. Referral/Consultation                               | <input type="checkbox"/> Failure in ordering referral/calling consult<br><input type="checkbox"/> Failure/delay in consult completion or obtaining/scheduling ordered referral<br><input type="checkbox"/> Error in diagnostic consultation performance<br><input type="checkbox"/> Failure/delayed communication/follow-up consultation                                                                                                                                                                                                                                                                                                                                                                                                               |
| 7. Follow-up                                           | <input type="checkbox"/> Failure to refer patient to close/safe setting/monitoring<br><input type="checkbox"/> Failure/delay in timely follow-up/rechecking of patient                                                                                                                                                                                                                                                                                                                                                                                                                                                                                                                                                                                 |
